# Supplementary material for: Decreased Broca-Left Supplementary Motor Area Connectivity underlying Auditory Verbal Hallucination: A Resting-State NIRS Study
Source: Research Square preprint supplement (doi:10.21203/rs.3.rs-7173755/v1), 2025-08-04
Supplement: Supplementary file 1 [file 989ceb5a3dc93c9d5b25ac6f.xlsx]

## Sheet: MNI坐标
Channel Name	X	Y	Z	network
CH1	71	-13.6667	-18.6667	Middle Temporal gyrus
CH2	73	-27.6667	-0.66667	Middle Temporal gyrus
CH3	60	12.3333	-19.3333	Temporopolar area
CH4	52.6667	45.6667	-10.3333	Inferior prefrontal gyrus
CH5	59	32.3333	3.6667	Pars triangularis Broca’s area
CH6	38.3333	64.6667	-6.6667	Frontopolar area
CH7	14.6667	73	-4.6667	Frontopolar area
CH8	29.6667	68	11	Frontopolar area
CH9	-12.6667	73	-2.6667	Frontopolar area
CH10	-36.3333	64	-4.3333	Frontopolar area
CH11	-26.6667	67.3333	13.3333	Frontopolar area
CH12	-51	45.6667	-7.6667	Inferior prefrontal gyrus
CH13	-58	12	-14	Temporopolar area
CH14	-56	32.6667	7.6667	Pars triangularis Broca’s area
CH15	-70	-13.6667	-16.3333	Middle Temporal gyrus
CH16	-71	-28.6667	2.3333	Middle Temporal gyrus
CH17	67	-0.33333	-1.3333	Superior Temporal gyrus
CH18	70	-11.3333	20.6667	Subcentral area
CH19	63	15.3333	20.3333	Pars triangularis Broca’s area
CH20	66.3333	-3.6667	35.3333	Pre-Motor and Supplementary Motor Cortex
CH21	47.6667	54.3333	7.6667	Frontopolar area
CH22	54	38.6667	21.6667	Dorsolateral prefrontal cortex
CH23	38.3333	55.3333	26.3333	Frontopolar area
CH24	43.3333	40.3333	37.3333	Dorsolateral prefrontal cortex
CH25	0.33333	68	10.6667	Frontopolar area
CH26	14.6667	66	29.6667	Frontopolar area
CH27	-13.3333	64.3333	30.3333	Frontopolar area
CH28	0.66667	55	40.6667	Dorsolateral prefrontal cortex
CH29	-44.3333	53.6667	9.6667	Frontopolar area
CH30	-35.6667	55	27	Frontopolar area
CH31	-50	38.6667	24.6667	Dorsolateral prefrontal cortex
CH32	-40.6667	38.6667	38.6667	Dorsolateral prefrontal cortex
CH33	-63.6667	-0.66667	5.3333	Superior Temporal gyrus
CH34	-60	14.6667	23.6667	Pars triangularis Broca’s area
CH35	-68	-13.3333	23.3333	Subcentral area
CH36	-63	-5.6667	37.3333	Pre-Motor and Supplementary Motor Cortex
CH37	56	22.6667	33.3333	Dorsolateral prefrontal cortex
CH38	57.3333	2.3333	48.6667	Pre-Motor and Supplementary Motor Cortex
CH39	45.6667	24.6667	49.6667	Includes Frontal eye fields
CH40	23.3333	53.6667	41.3333	Dorsolateral prefrontal cortex
CH41	29.3333	37.3333	51.3333	Includes Frontal eye fields
CH42	11.6667	45.3333	53.6667	Includes Frontal eye fields
CH43	-21	52	41.6667	Dorsolateral prefrontal cortex
CH44	-10.3333	44.6667	53.3333	Includes Frontal eye fields
CH45	-27.3333	35.3333	51.6667	Includes Frontal eye fields
CH46	-53	20.6667	36.6667	Dorsolateral prefrontal cortex
CH47	-43.3333	22.3333	51.3333	Includes Frontal eye fields
CH48	-54.3333	0.33333	50.3333	Pre-Motor and Supplementary Motor Cortex
CH49	73	-34.3333	2.3333	Superior Temporal gyrus
CH50	71	-40.6667	12.6667	Superior Temporal gyrus
CH51	70	-39.6667	24.6667	Supramarginal gyrus part of Wernicke’s area
CH52	-70.3333	-35.3333	4.6667	Superior Temporal gyrus
CH53	-70	-40.6667	11.3333	Superior Temporal gyrus
CH54	-68	-41.3333	22.6667	Supramarginal gyrus part of Wernicke’s area
